# Supplementary material for: The Occurrence of Cryptosporidium spp. in Wild-Living Carnivores in Poland—A Question Concerning Its Host Specificity
Source: MDPI journal article supplement (doi:10.3390/pathogens12020198), 2023-01-28
Supplement: s1 [file s1]

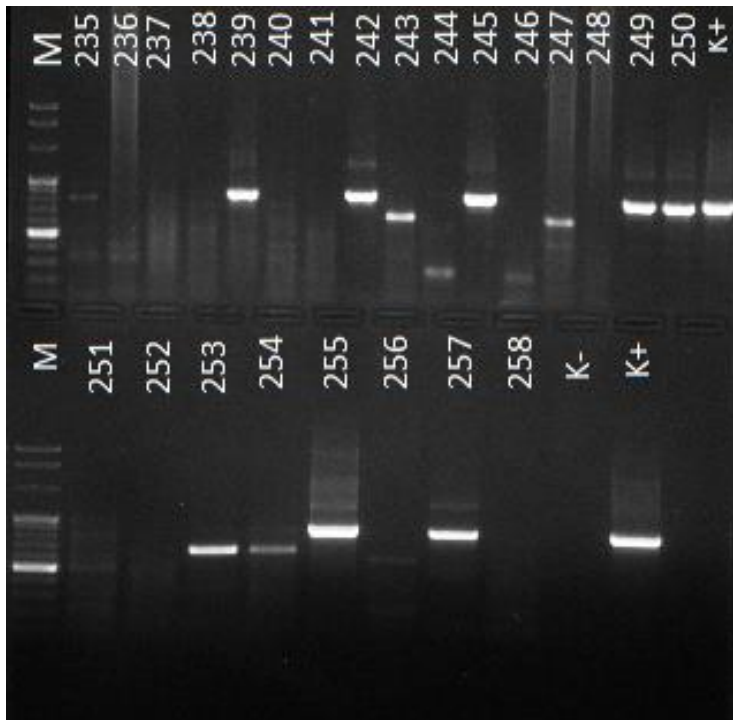

Figure S1. M-DNA mass marker (DNA Ladder, EURx), 235-258 are tested samples, K- - negative control (with distilled water), K+ - positive control. Electrophoregram presenting study results – *Cryptosporidium* spp. (18S rRNA as target; 819 to 825 bp).

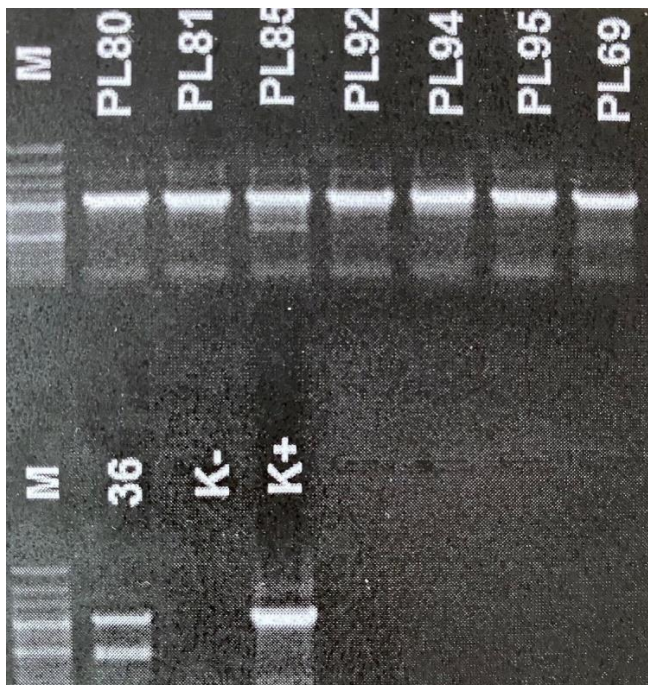

Figure S2. M-DNA mass marker (DNA Ladder, EURx), PL80, PL81, PL85, PL92, PL94, PL95, PL69, 36 are tested samples, K- -negative control (with distilled water), K+ - positive control. Electrophoregram presenting study results – *Cryptosporidium* spp. (actin gene as target; ~1,066 bp).
